# Supplementary material
Source: Springer Nature journal article supplement (https://www.springermedizin.de/resource/supplementary/12960_2009_221_MOESM2_ESM.pdf/9570676)

### Sex: EX2004

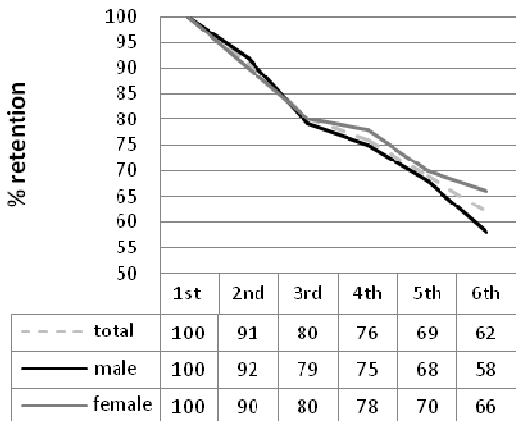

### Age: EX2004

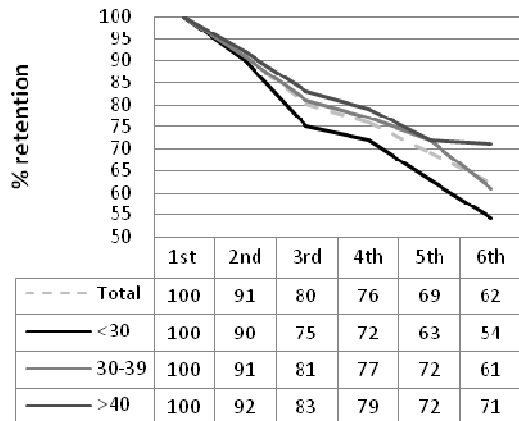

### Country of birth, Sweden: EX2004

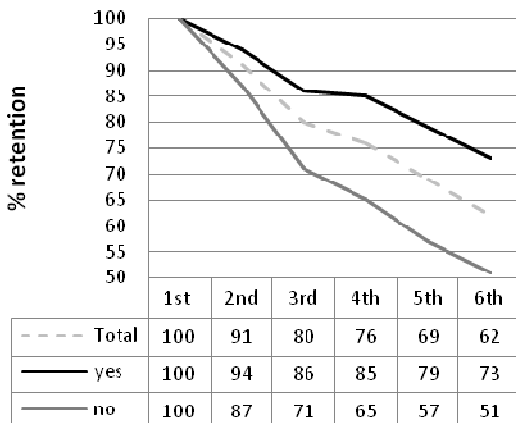

### Cohabiting: EX2004

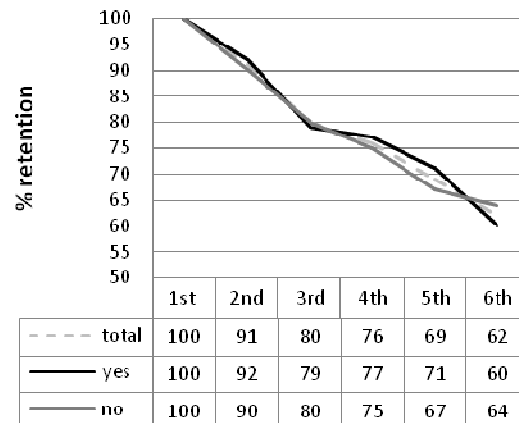

### Self-rated health: EX2004

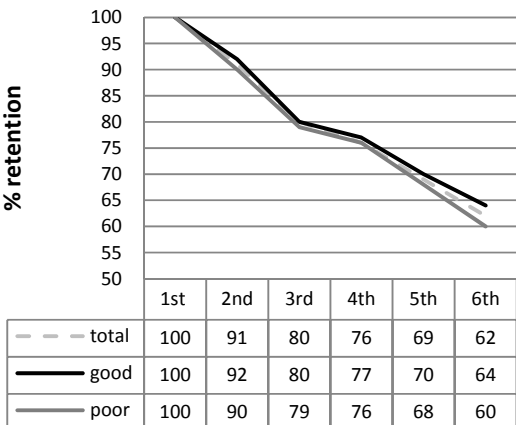

Supplement: MOESM2 [file 9570676]
